# Supplementary material for: Rescuing Loading Induced Bone Formation at Senescence
Source: PLoS Comput Biol. 2010 Sep 9;6(9):e1000924. doi: 10.1371/journal.pcbi.1000924 (PMC2936512; doi:10.1371/journal.pcbi.1000924)
Supplement: Table S2 — Definitions for notations and symbols used in manuscript. (0.09 MB DOC) [file pcbi.1000924.s003.doc]

Table S2: Notations used in manuscript and their definitions

| Notation | Definitions |
| --- | --- |
|  | Strain at the location of the ith mechanosensory osteocyte at time ‘t’ |
|  | Ca2+ oscillation induced in cell ‘i’ at time ‘t’ |
|  | Ca2+ oscillation induced in ith cell by strain |
|  | Ca2+ oscillation induced in ith cell by cell-cell signaling |
|  | Amount of Ca2+ within ER store of ith cell at time ‘t’ |
|  | **Model parameter** that defines the threshold strain magnitude that maximizes Ca2+ oscillation amplitudes |
|  | **Model parameter** defining the maximal ERCa2+ store capacity |
|  | **Model parameter** defining themaximal ERCa2+ store recovery rate |
|  | Dephosphorylated NFAT accumulated in ith precursor cell at time ‘t’ |
|  | **Model parameter** that controls the amount of NFAT dephosphorylated based upon prior Ca2+ oscillations |
|  | Time duration of a given loading bout |
|  | Dephosphorylated NFAT translocated to the ith precursor cell’s nucleus |
|  | **Model parameter** defining the maximal nuclear NFAT DNA binding capacity |
|  | **Model parameter** defining the maximal relative mineral apposition rate in osteoblasts |
|  | Relative mineral apposition rate induced in the ith osteoblast |
|  | Tissue level relative mineral apposition rate |
|  | Tissue level surface referent relative mineralizing surface |
|  | Tissue level surface referent relative bone formation rate |
|  | Tissue level surface referent relative periosteal bone formation rate |
|  | Vector of model parameters (,,,,,) |
|  | Mean rp.BFR value simulated by the model for the ith loading protocol |
|  | Model variance in simulating rp.BFR values for the ith loading protocol |
|  | Log-likelihood function for the model, given the vector of means, *()*, and variances, *2* |
